# Maternal age at birth and daughters' subsequent childlessness

O. Basso<sup>1,2,\*</sup>, C.R. Weinberg<sup>3</sup>, A.A. D'Aloisio<sup>4</sup>, and D.P. Sandler<sup>5</sup>

<sup>1</sup>Department of Obstetrics and Gynecology, Royal Victoria Hospital, Research Institute of McGill University Health Centre, Montreal, Canada H4A 3J1

<sup>2</sup>Department of Epidemiology, Biostatistics, and Occupational Health, McGill University, Montreal, Canada H3A 1A2

<sup>3</sup>Biostatistics and Computational Biology Branch, National Institute of Environmental Health Sciences, Research Triangle Park 27709, USA

<sup>4</sup>Social & Scientific Systems Inc., Durham, NC 27703, USA <sup>5</sup>Epidemiology Branch, National Institute of Environmental Health Sciences, Research Triangle Park 27709, USA

\*Correspondence address. Purvis Hall, 1020 Pine Avenue West, Montreal, Quebec, Canada H3A 1A2. Tel: +1-514-398-6261;

E-mail: olga.basso@mcgill.ca

Submitted on August 24, 2017; resubmitted on October 22, 2017; accepted on November 3, 2017

**STUDY QUESTION:** Does maternal age at a daughter's birth predict her subsequent probability of lifelong childlessness?

**SUMMARY ANSWER:** In this study population, women born to older mothers were more likely to be childless.

**WHAT IS KNOWN ALREADY:** Although maternal age at childbearing is increasing in many countries, there is limited evidence on whether being born to older parents may influence offspring fertility.

**STUDY DESIGN SIZE AND DURATION:** This analysis included 43 135 women from the US-based Sister Study, a cohort study of 50 884 sisters of women with breast cancer recruited between 2003 and 2009.

**PARTICIPANTS/MATERIALS, SETTING, METHODS:** Participants had no breast cancer at baseline. Women were included in the analytic sample if they were born between 1930 and 1964 and were at least 44 years old at enrolment. Median age when reproductive history was last ascertained was 63.8 years. We estimated relative risks (RR) and 95% CI of lifelong childlessness as a function of maternal age at birth, using multivariable log-binomial models, including total number of siblings, birth order, socioeconomic indicators of the family of origin, race and birth cohort. We examined the association in different subgroups and in a sibling-matched analysis including 802 sister pairs discordant for childlessness.

**MAIN RESULTS AND ROLE OF CHANCE:** Compared with women born to 20–24-year-old mothers, those born to mothers aged 25–29, 30–34 and  $\geq 35$  years were more likely to be childless [RR (95% CI): 1.21 (1.14–1.29), 1.30 (1.22–1.39) and 1.40 (1.31–1.50), respectively]. The association was consistent in strata defined by birth cohort, number of siblings, birth order, and participant's educational level, as well as within sister pairs. Overall, we found weak evidence for an independent contribution of paternal age at birth to the daughter's probability of childlessness.

**LIMITATIONS REASONS FOR CAUTION:** All participants had at least one sister, and all information was self-reported. We had no knowledge of whether childlessness was intentional and found only a modest association between maternal age at birth and self-reported indicators of infertility. Still, the association with childlessness was highly consistent.

**WIDER IMPLICATIONS OF THE FINDING:** Given the widespread tendency to delay childbearing, evaluating the influence of maternal age at birth on offspring fertility is a public health priority.

**STUDY FUNDING/COMPETING INTERESTS:** This research was supported in part by the Intramural Research Programme of the NIH, National Institute of Environmental Health Sciences (Z01-ES044005). The authors report no conflict of interest.

**Key words:** maternal age at birth / paternal age at birth / delayed childbirth / childlessness / fertility

## Introduction

Since the 1970s, maternal age at first birth has been increasing in many countries, resulting in rising rates of infertility and childlessness (Schmidt et al., 2012; te Velde et al., 2012; Mathews and Hamilton, 2016; OECD, 2016). As more women conceive for the first time when oocyte quality is declining, it is important to ascertain whether being born to an older mother may negatively affect reproductive function. To date, relatively few studies have examined this question, with mixed results. Studies of reconstructed families from Europe have suggested that daughters of older mothers have lower fertility (Gillespie et al., 2013; Smits et al., 2002) and a higher probability of childlessness (Smits et al., 2002). In a study of Canadian women born in 1850–1899, time from marriage to first birth was slightly (though not statistically significantly) longer in daughters of younger and older mothers (Smits et al., 1999); however, time to first birth was not associated with maternal age  $\geq 30$  in British men and women born in 1958 (Joffe and Barnes, 2000). In a registry-based Dutch study, individuals whose parents were older when they first had a child were more likely to remain childless (Steenhof and Liefbroer, 2008); however, only older paternal age at birth predicted childlessness in a cohort of men and women from Wisconsin (Fieder and Huber, 2015). Among women attending a fertility clinic, those born to mothers aged  $\geq 39$  had a higher risk of menstrual disorders (Smits et al., 1997). In a small study of infertile patients and their fertile siblings, older maternal age predicted infertility only in men (Tarín et al., 2001).

Although the observed intergenerational continuities in fertility behaviour appear to be driven by parental transmission of socio-economic status, education and values (Kolk, 2014; Liefbroer and Elzinga, 2012), physiologic mechanisms may also play a role. The foetal and early life environment can exert long-lasting effects on reproductive function (Ho et al., 2017; Qian et al., 2015; Sominsky et al., 2015; Zambrano et al., 2014). Global expression profiles in human oocytes vary with age (Steuerwald et al., 2007), and epigenetic alterations in oocytes can persist in the next generation (Ge et al., 2015; Qian et al., 2015). Epigenetic dysregulation may explain the higher risk of neurodevelopmental disorders (Lee and McGrath, 2015; Sandin et al., 2012) and childhood cancers (Johnson et al., 2009; Yip et al., 2006) in children of older parents (Johnson et al., 2009; Perrin et al., 2010). In infants, differential DNA methylation by maternal age has been reported in two studies, although at different loci (Adkins et al., 2011; Markunas et al., 2016).

In this article, we used data from the Sister Study to examine whether daughters of older mothers were more likely to be childless, taking into account several childhood and adult factors known to influence reproductive behaviour.

## Materials and Methods

### Study population

The Sister Study is a cohort study of 50 884 women from the US and Puerto Rico, enrolled between 2003 and 2009. Women were eligible to participate if they were between 35 and 74 years old, had at least one full or half-sister who had had breast cancer, and had not been diagnosed with breast cancer. Participants answered an extensive set of questions through computer-assisted interviews and self-administered questionnaires, including modules about their family of origin, selected childhood exposures, reproductive

history, and past and current health conditions. Sister study participants are followed at (approximately) regular intervals, whereupon information on reproductive history, menopause and health status is updated. By design, all participants in the study have at least one sister. More details on the study are provided elsewhere (Sandler et al., in press). Women were eligible for this analysis if they were at least 44 years old at enrolment (so that virtually all would have complete reproductive histories), had been born between 1930 and 1964, and had not been adopted (to increase the likelihood that they could report on their biological mother) ( $n = 44\,792$ ). We additionally excluded 657 women who had not completed the questionnaire that captured family information, and 1000 because of missing data on other key variables (Supplementary Fig. S1). The analytic sample consisted of 43 135 women (96.3% of eligible), including 3389 with at least one other sister in the dataset. Sisters were matched based on full name and date of birth, per the information provided by each participant. In some cases, women who were not sisters may have been matched due to having a common name or because of the extended algorithms allowing for minor discrepancies in spelling or dates.

Childlessness was defined as not having had a live birth. Maternal age at the participant's birth (from now on referred to as maternal age at birth) was reported in years by 92.4% of women and in 5-year categories by 4.1% (imputed as the mid-point of the category ( $n = 1748$ )). For the remaining 3.5%, maternal age at birth was based on the mother's year of birth, estimated from her age at the time of the daughter's interview ( $n = 476$ ), or if she had died, from year of death and age at death, as reported by the daughter ( $n = 1053$ ).

The Sister Study was approved by the Institutional Review Boards (IRB) of the National Institute of Environmental Health Sciences, National Institutes of Health, and the Copernicus Group; this analysis was approved by the IRB of McGill University Health Centre.

### Statistical analysis

All analyses were carried out with Stata 14.2 (College Station, TX, USA). We estimated relative risks (RR) and 95% CI using multivariable log-binomial regression, with a robust variance estimator to account for the correlation among sisters. We examined maternal age at birth as a categorical variable (<20, 20–24, 25–29, 30–34 and 35+ years) and considered the following childhood predictors as covariates: total number of siblings (both full and half siblings, born either before or after the participant), birth order (first, second or higher), indicators of socioeconomic status during childhood (highest household education when the participant was 13 and income level growing up, in categories), race/ethnicity (non-Hispanic White, non-Hispanic Black, Hispanic and other), and 5-year birth cohort. In one model, we included continuous paternal and maternal age at birth; however, given the results and, especially, the high correlation between maternal and paternal age ( $r = 0.79$ ), we further considered paternal age at birth only in a subanalysis (described in a later section).

After examining maternal age in a model including all women and all covariates, we carried out several subgroup analyses: by birth cohort (1930–1944, 1945–1954 and 1955–1964), number of siblings (1, 2–3 and 4+), and birth order (1,  $\geq 2$ ) (the latter two restricted to women from full-sibling families). To evaluate whether our findings may have been confounded by parental infertility, we performed a subanalysis among third- or later-born daughters of mothers who had had their first child before age 24 (23 was the median age at first birth among the participants' mothers). We then examined the association in strata defined by highest household education when the participant was 13.

After identifying characteristics that differed between women with and without children, we evaluated whether maternal age at birth was associated with never having legally married (this group does not include women who reported that they were living as married), having obtained a postgraduate degree, having unsuccessfully tried to conceive for longer

than 1 year, and having ever taken fertility medications. Based on these results, we carried out sensitivity analyses to assess whether the association between maternal age at birth and childlessness persisted when excluding women who had never married and when stratifying by the participant's education. We further evaluated whether having an older father, relative to the mother, independently contributed to the probability of childlessness (excluding those who had never married). Within each category of maternal age, we divided father's age into two groups, one including the lowest 75% and the other including the highest 25%, thereby generating a 10-level factor variable.

We checked our findings stratifying by daughters' birth order (i.e. ignoring brothers) and in two additional subgroups: (i) women who were at least 56 when reproductive history was last updated and had not received a diagnosis of breast cancer through age 55 and (ii) women who had never married. In

two other models, we adjusted for factors that may have affected reproductive development: (i) prenatal exposure to diethylstilbestrol (DES) and maternal smoking during pregnancy (Palmer *et al.*, 2001; Ye *et al.*, 2010), and (ii) feeding as an infant (breastfed or not and soy formula or not, with non-mutually exclusive categories; Jefferson *et al.*, 2012).

For all stratified analyses, which include different sets of covariates, we show estimates (RR and 95% CI) and predictive marginal probabilities of childlessness (in %, obtained with the *margins* command in Stata) only for maternal age at birth.

Finally, to better account for family factors shared among sisters, we used conditional logistic regression to estimate the association between mother's age at birth and childless in 802 pairs of sisters from full sibling families, after excluding 24 pairs because of inconsistencies in number of siblings or mother's age within pairs.

**Table 1** Characteristics of participants, by maternal age at birth. Data are *n* (%).

| Characteristic                       | Mother's age at participant's birth, years |                            |                            |                          |                        |
|--------------------------------------|--------------------------------------------|----------------------------|----------------------------|--------------------------|------------------------|
|                                      | <20<br><i>n</i> = 2014                     | 20–24<br><i>n</i> = 10 347 | 25–29<br><i>n</i> = 13 452 | 30–34<br><i>n</i> = 9952 | 35+<br><i>n</i> = 7370 |
| Father's age                         |                                            |                            |                            |                          |                        |
| ≤31                                  | 1919 (95.2)                                | 9369 (90.6)                | 9301 (69.1)                | 2099 (21.1)              | 164 (2.2)              |
| 32+                                  | 61 (3.0)                                   | 910 (8.8)                  | 4078 (30.3)                | 7796 (78.3)              | 7166 (97.2)            |
| Missing                              | 34 (1.7)                                   | 5 (0.6)                    | 73 (0.5)                   | 57 (0.6)                 | 40 (0.5)               |
| Total no. of siblings <sup>a</sup>   |                                            |                            |                            |                          |                        |
| 1–2                                  | 585 (29.1)                                 | 3531 (34.1)                | 4868 (36.2)                | 3402 (34.2)              | 1881 (25.5)            |
| 3–4                                  | 758 (37.6)                                 | 3977 (38.4)                | 4845 (36.0)                | 3464 (34.8)              | 2370 (32.2)            |
| 5–6                                  | 406 (20.2)                                 | 1703 (16.5)                | 2131 (15.8)                | 1630 (16.4)              | 1446 (19.6)            |
| 7+                                   | 265 (13.2)                                 | 1136 (11.0)                | 1608 (12.0)                | 1456 (14.6)              | 1673 (22.7)            |
| Firstborn                            | 1482 (73.6)                                | 4821 (46.6)                | 3019 (22.4)                | 887 (8.9)                | 157 (2.1)              |
| Race/ethnicity                       |                                            |                            |                            |                          |                        |
| Non-Hispanic White                   | 1455 (72.2)                                | 8750 (84.6)                | 11 788 (87.6)              | 8670 (87.1)              | 6272 (85.1)            |
| Non-Hispanic Black                   | 345 (17.1)                                 | 854 (8.3)                  | 836 (6.2)                  | 681 (6.8)                | 595 (8.1)              |
| Hispanic                             | 126 (6.3)                                  | 449 (4.3)                  | 502 (3.7)                  | 385 (3.9)                | 339 (4.6)              |
| Other                                | 88 (4.4)                                   | 294 (2.8)                  | 326 (2.4)                  | 216 (2.2)                | 164 (2.2)              |
| Max household education <sup>b</sup> |                                            |                            |                            |                          |                        |
| <High school                         | 589 (29.3)                                 | 1675 (16.2)                | 2037 (15.1)                | 1861 (18.7)              | 2043 (27.7)            |
| High school/GED                      | 975 (48.4)                                 | 4377 (42.3)                | 4719 (35.1)                | 3263 (32.8)              | 2264 (30.7)            |
| Some college <sup>c</sup>            | 293 (14.6)                                 | 2080 (20.1)                | 2640 (19.6)                | 1876 (18.9)              | 1288 (17.5)            |
| BA or higher                         | 157 (7.8)                                  | 2215 (21.4)                | 4056 (30.2)                | 2952 (29.7)              | 1775 (24.1)            |
| Income growing up <sup>d</sup>       |                                            |                            |                            |                          |                        |
| Well-off                             | 40 (2.0)                                   | 504 (4.9)                  | 953 (7.1)                  | 699 (7.0)                | 498 (6.8)              |
| Middle income                        | 998 (49.6)                                 | 6226 (60.2)                | 8295 (61.7)                | 6041 (60.7)              | 4053 (55.0)            |
| Low income                           | 715 (35.5)                                 | 2836 (27.4)                | 3282 (24.4)                | 2466 (24.8)              | 2070 (28.1)            |
| Poor                                 | 261 (13.0)                                 | 781 (7.6)                  | 922 (6.9)                  | 746 (7.5)                | 749 (10.2)             |
| Birth cohort                         |                                            |                            |                            |                          |                        |
| 1930–1944                            | 614 (30.5)                                 | 3237 (31.3)                | 4071 (30.3)                | 2788 (28.0)              | 1917 (26.0)            |
| 1945–1954                            | 860 (42.7)                                 | 4513 (43.6)                | 5989 (44.5)                | 4319 (43.4)              | 3026 (41.1)            |
| 1955–1964                            | 540 (26.8)                                 | 2597 (25.1)                | 3392 (25.2)                | 2845 (28.6)              | 2427 (32.9)            |
| Had no children                      | 256 (12.7)                                 | 1576 (15.2)                | 2444 (18.2)                | 1918 (19.3)              | 1462 (19.8)            |

<sup>a</sup>Includes full and half siblings born before and after the participant.

<sup>b</sup>Highest level of education in the household when participant was 13 years old.

<sup>c</sup>Includes associate degree.

<sup>d</sup>Based on participant's subjective report.

## Results

Median age at recruitment in the analysis sample was 56.9 years. Reproductive history was updated in at least one follow-up interview for 99.5% of the women; median age at the latest update was 63.8 (interquartile range: 58.2–70.0; 98% were 50 or older). In total, 7656 women (17.8%) had not had a live birth. Table I shows the characteristics of participants by maternal age at birth. Women born to the youngest mothers were more frequently the firstborn, less frequently non-Hispanic White, and more likely to be from less educated and poorer families. Women born to the oldest mothers were rarely the firstborn, had more siblings, and came from families from both the lowest and highest educational and income levels.

Table II shows the results of the multivariable model including all women in the analytic sample. Maternal age at birth was positively associated with subsequent daughter's childlessness. Firstborn daughters and those born in families with higher parental education were also more likely to not have children, while having more siblings was associated with a lower likelihood of being childless. There was a strong birth cohort effect, with the probability of childlessness increasing rapidly across birth years beginning in the 1940s. When maternal and paternal age at the daughter's birth were included as linear terms in a model including the same predictors shown in Table II, the RR for a 1-year increase was 1.016 (95% CI: 1.010–1.021) for mother's age and 1.006 (95% CI: 1.001, 1.010) for father's age. (Paternal age was further considered only in a subanalysis.)

Figure 1 shows that the association between maternal age and childlessness was consistent across birth cohorts, and in strata based on number of siblings and birth order. The association persisted after restricting the analysis to third or higher order daughters born to mothers who had had their first child before age 24, i.e. in women whose parents likely had no fertility problems (right panel, last model). Stratifying by highest household education when the participant was 13 yielded similar findings (Supplementary Fig. S2).

Compared with women who had had at least one child, those who had none were substantially more likely to have obtained a postgraduate degree (36.8 versus 21.7%), to never have married (22.4 versus 1%), and to self-report as homosexual (5.3 versus 0.3%). They were also more likely to report having taken fertility medications (9.7 versus 6.4%) and having attempted to conceive for >1 year without success (17.3 versus 10.4%; however, 8% of women did not take part in the follow-up interview in which this question was asked, and 5% of those who participated did not answer the question). More childless women reported having been (definitely or probably) prenatally exposed to diethylstilbestrol (DES) (3.8 versus 2.1%; this information was missing for 15%). There were no differences in household income in the year prior to enrolment (Supplementary Table S1).

Having been born to a mother  $\geq 25$  years was associated with a higher probability of never having married (although the absolute risk was low) and of having obtained a postgraduate degree (Supplementary Fig. S3, left). However, older maternal age at the daughter's birth was not associated with having unsuccessfully tried to conceive for longer than 1 year and only weakly with having taken fertility drugs (Supplementary Fig. S3, right; the latter analysis was restricted to women born after 1944).

Although being born to an older mother predicted both never having married and having achieved a higher education, these factors did

**Table II Relative risk (RR) and 95% CI of childlessness, all women. Multivariable log-binomial regression.**

|                         | % Childless | N      | RR    | (95% CI)    |
|-------------------------|-------------|--------|-------|-------------|
| Mother's age            |             |        |       |             |
| <20                     | 12.7        | 2014   | 0.84  | (0.74–0.95) |
| 20–24                   | 15.2        | 10 347 | (ref) |             |
| 25–29                   | 18.2        | 13 452 | 1.21  | (1.14–1.29) |
| 30–34                   | 19.3        | 9952   | 1.30  | (1.22–1.39) |
| 35+                     | 19.8        | 7370   | 1.40  | (1.31–1.50) |
| Total no. of siblings   |             |        |       |             |
| 1–2                     | 19.7        | 14 267 | (ref) |             |
| 3–4                     | 18.0        | 15 414 | 0.88  | (0.84–0.93) |
| 5–6                     | 16.1        | 7316   | 0.79  | (0.74–0.85) |
| 7+                      | 14.6        | 6138   | 0.72  | (0.67–0.78) |
| Birth order             |             |        |       |             |
| 1                       | 17.5        | 10 366 | 1.15  | (1.08–1.21) |
| 2+                      | 17.8        | 32 769 | (ref) |             |
| Race/ethnicity          |             |        |       |             |
| Non-Hispanic White      | 17.9        | 36 935 | (ref) |             |
| Non-Hispanic Black      | 17.7        | 3311   | 1.08  | (0.99–1.17) |
| Hispanic                | 15.0        | 1801   | 0.93  | (0.82–1.04) |
| Other                   | 15.9        | 1088   | 0.93  | (0.81–1.07) |
| Family income level     |             |        |       |             |
| Well-off                | 18.6        | 2694   | 0.94  | (0.86–1.02) |
| Middle income           | 18.6        | 25 613 | (ref) |             |
| Low income              | 16.7        | 11 369 | 1.07  | (1.02–1.13) |
| Poor                    | 14.5        | 3459   | 1.05  | (0.96–1.15) |
| Max household education |             |        |       |             |
| <High school            | 13.5        | 8205   | 0.88  | (0.82–0.95) |
| High school/GED         | 17.0        | 15 598 | (ref) |             |
| Some college            | 18.2        | 8177   | 1.06  | (1.00–1.12) |
| BA or higher            | 21.6        | 11 155 | 1.21  | (1.15–1.28) |
| Birth cohort            |             |        |       |             |
| 1930–1934               | 9.5         | 1526   | (ref) |             |
| 1935–1939               | 10.1        | 4186   | 1.05  | (0.88–1.26) |
| 1940–1944               | 13.6        | 6915   | 1.41  | (1.19–1.66) |
| 1945–1949               | 18.3        | 8928   | 1.91  | (1.62–2.24) |
| 1950–1954               | 20.4        | 9779   | 2.14  | (1.83–2.52) |
| 1955–1959               | 21.4        | 8214   | 2.27  | (1.93–2.67) |
| 1960–1964               | 21.4        | 3587   | 2.27  | (1.91–2.68) |

Observations: 43 135

(ref) indicates the reference category.

not explain the association between maternal age at birth and daughter's childlessness (Fig. 2). Given maternal age, the evidence for an additional effect of paternal age at birth was weak.

We checked whether the daughter's birth order (i.e. ignoring brothers) may have affected her reproductive behaviour (as, for example, youngest daughters may have been more likely to be the ones taking care of older parents and consequently delay starting a family). The

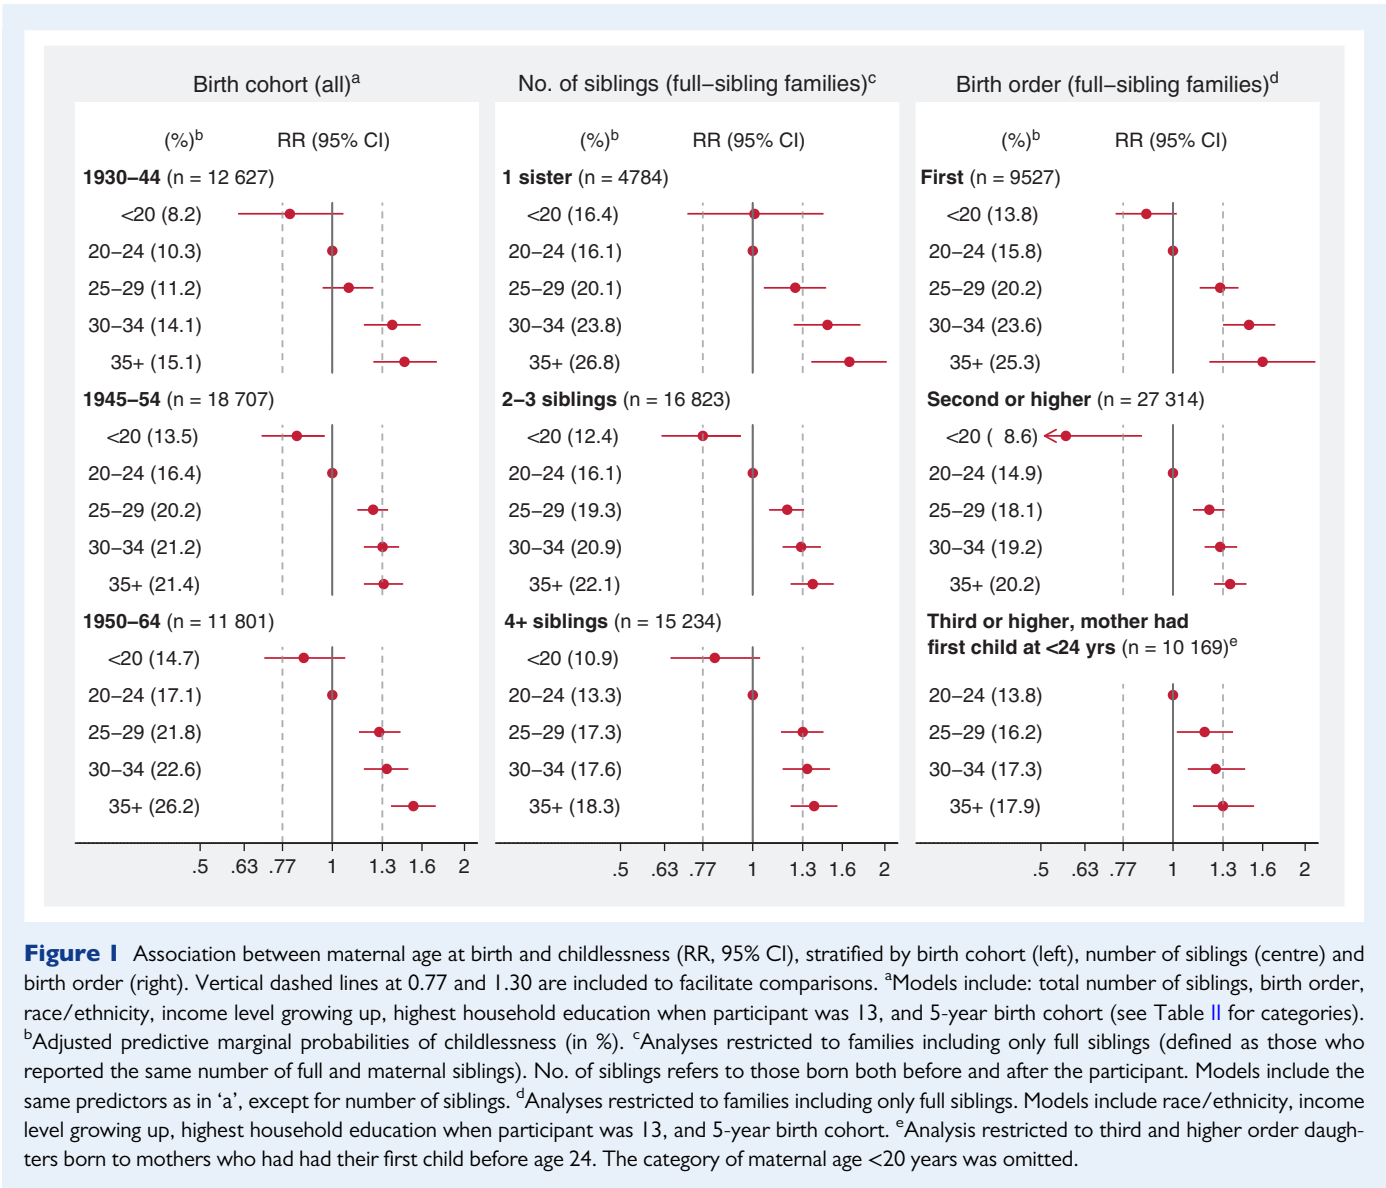

association between maternal age at birth  $\geq 35$  and childlessness was attenuated in middle daughters (Fig. 3), who, in general, were less likely to be childless. Unsurprisingly, middle daughters had overall more siblings (median: 4, 25th and 75th percentiles: 3 and 6) than oldest and youngest ones (median: 3, 25th and 75th percentiles: 2 and 4 in both groups). The proportion of women  $\geq 35$  who went on to have two or more children after the participant's birth was 18.2% among mothers of middle daughters, versus 13.1 and 2.7% among mothers of oldest and youngest daughters, respectively.

The final sensitivity analyses are shown in Supplementary Fig. S4. Results were virtually unchanged when we restricted the analysis to women whose reproductive history was updated at age 56 or later and had no breast cancer diagnosis through age 55. Maternal age at birth was associated with childlessness even in women who had never married, despite the fact that, in this group, 82.3% had no children. Adjusting for prenatal exposure to DES and maternal smoking, or for having been breastfed or given soy formula as an infant did not affect the estimates. Prenatal exposure to DES was associated with a higher probability of

childlessness (RR: 1.35, 95% CI: 1.22, 1.49); women who had been breastfed were slightly more likely to be childless (RR: 1.05, 95% CI: 1.00–1.10). Maternal smoking during pregnancy and having been fed soy formula were not associated with childlessness (but only 2.6% of women with non-missing information reported exposure to the latter).

The sibling analysis, based on 802 sister pairs discordant for childlessness, suggested that the odds of childlessness increased with increasing maternal age at birth ( $P = 0.0013$ ) (Supplementary Table SII). To check whether this association was driven by siblings born several years apart (i.e. potentially confounded by birth cohort effects), we restricted the analysis to pairs born within 5 years of each other. Although the precision of the estimates diminished considerably, the trend remained (Supplementary Table SIII).

## Discussion

In this study, women born to older mothers were substantially more likely to be childless. The estimated associations were consistent, on



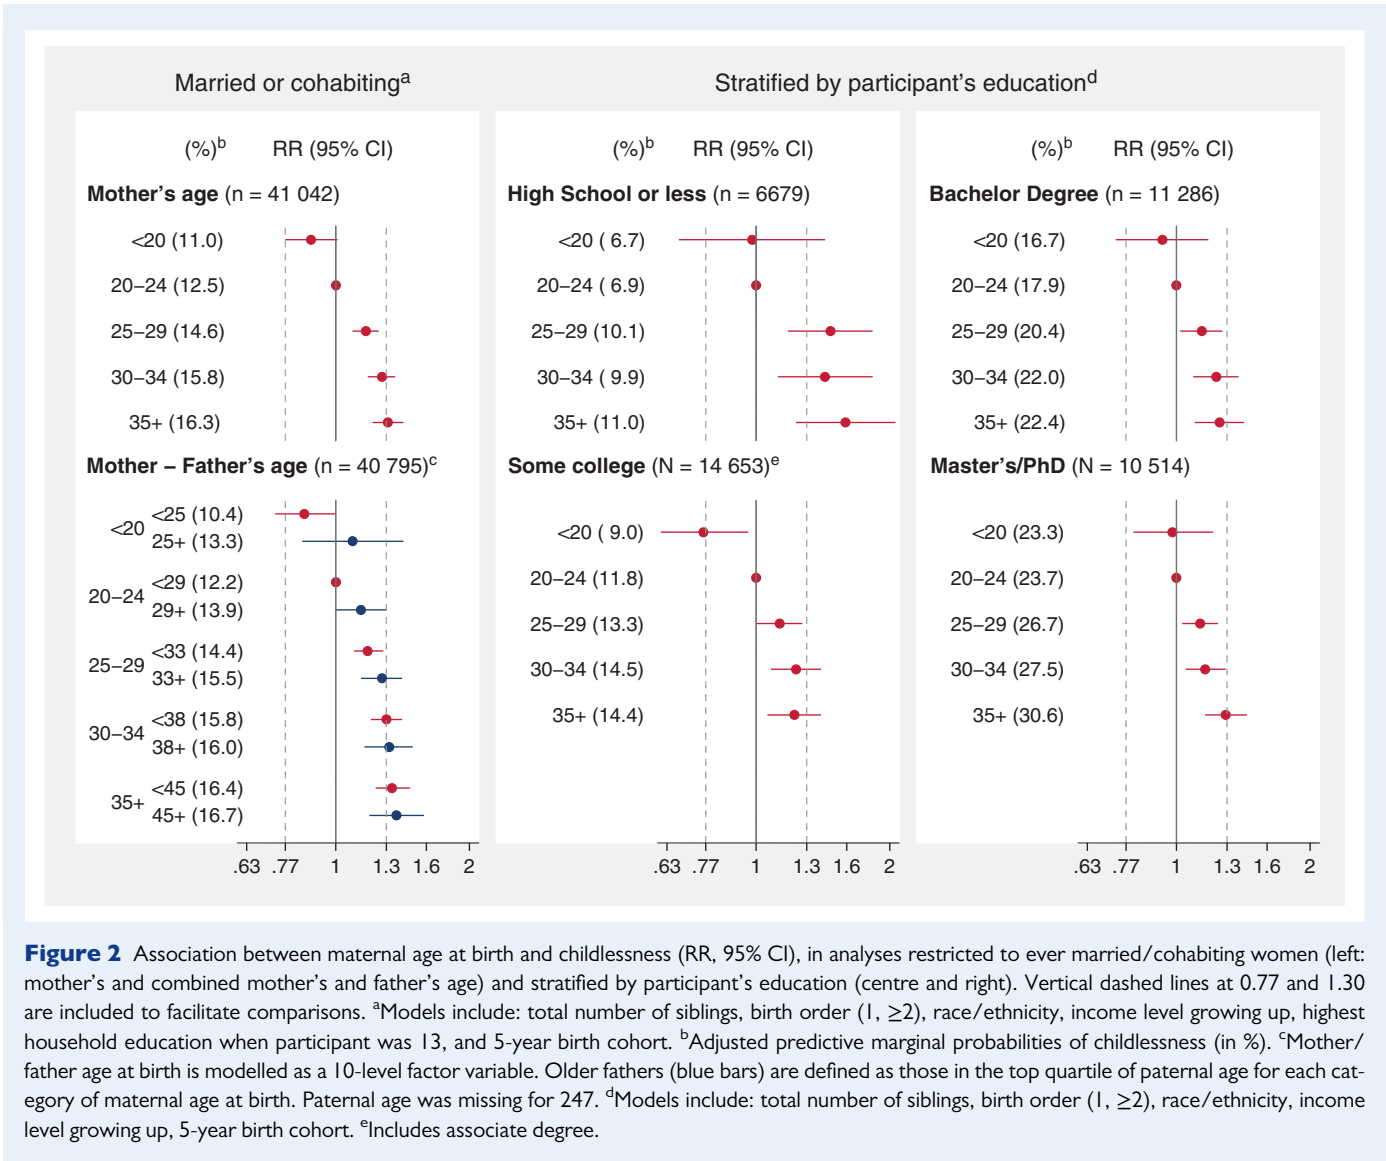

**Figure 2** Association between maternal age at birth and childlessness (RR, 95% CI), in analyses restricted to ever married/cohabiting women (left: mother's and combined mother's and father's age) and stratified by participant's education (centre and right). Vertical dashed lines at 0.77 and 1.30 are included to facilitate comparisons. <sup>a</sup>Models include: total number of siblings, birth order (1, ≥2), race/ethnicity, income level growing up, highest household education when participant was 13, and 5-year birth cohort. <sup>b</sup>Adjusted predictive marginal probabilities of childlessness (in %). <sup>c</sup>Mother/father age at birth is modelled as a 10-level factor variable. Older fathers (blue bars) are defined as those in the top quartile of paternal age for each category of maternal age at birth. Paternal age was missing for 247. <sup>d</sup>Models include: total number of siblings, birth order (1, ≥2), race/ethnicity, income level growing up, 5-year birth cohort. <sup>e</sup>Includes associate degree.

the relative scale, across birth cohorts and in strata defined by number of siblings and birth order, despite differences in the absolute probability of childlessness. The association persisted after accounting for not having married and for education, known predictors of childlessness (Hayford, 2013), and after controlling for shared family factors.

In mice, older maternal age has been associated with placental morphological abnormalities and delayed offspring development (Lopes et al., 2009). Pups conceived by older dams and transferred into younger ones at the blastocyst stage had altered growth and impaired cardiometabolic health in the postnatal period (Velazquez et al., 2016). Among mice nurtured by 3-month old foster mothers, hippocampal gene expression and behaviour differed in those born to 18-month old mothers, compared with same-age mice born to 3-month old mothers (Sampino et al., 2017).

Evidence of reduced lifetime reproductive success in offspring of older mothers has been observed in two species of birds (Bouwhuis et al., 2015; Schroeder et al., 2015). In humans, daughters of older mothers have been found to have fewer children or a higher probability of remaining childless in some (Gillespie et al., 2013; Smits et al., 2002;

Steenhof and Liefbroer, 2008) but not all (Fieder and Huber, 2015), studies.

The mechanisms by which mother's age at conception and during pregnancy may physiologically influence the daughter's reproductive function are unknown; however, older age is associated with differential gene expression in oocytes (Steuerwald et al., 2007) and may affect the offspring epigenome (Adkins et al., 2011; Markunas et al., 2016). The loci reported as having differential methylation patterns in the first of these studies (Adkins et al., 2011) have not been further corroborated, but the negative correlation between maternal age at daughter's birth and methylation at four CPG sites of KLHL35 found in the later study was replicated in two independent populations (including a subsample of women from the Sister Study) (Markunas et al., 2016).

As we found no association between older maternal age at birth and daughters' reports of trying to conceive for longer than one year, and only a weak association with use of fertility drugs, our data provide limited support for a mechanism acting directly on fecundity. Reproduction is influenced by social, cultural and biological factors. DNA methylation can influence behaviour and is reportedly sensitive to early-life

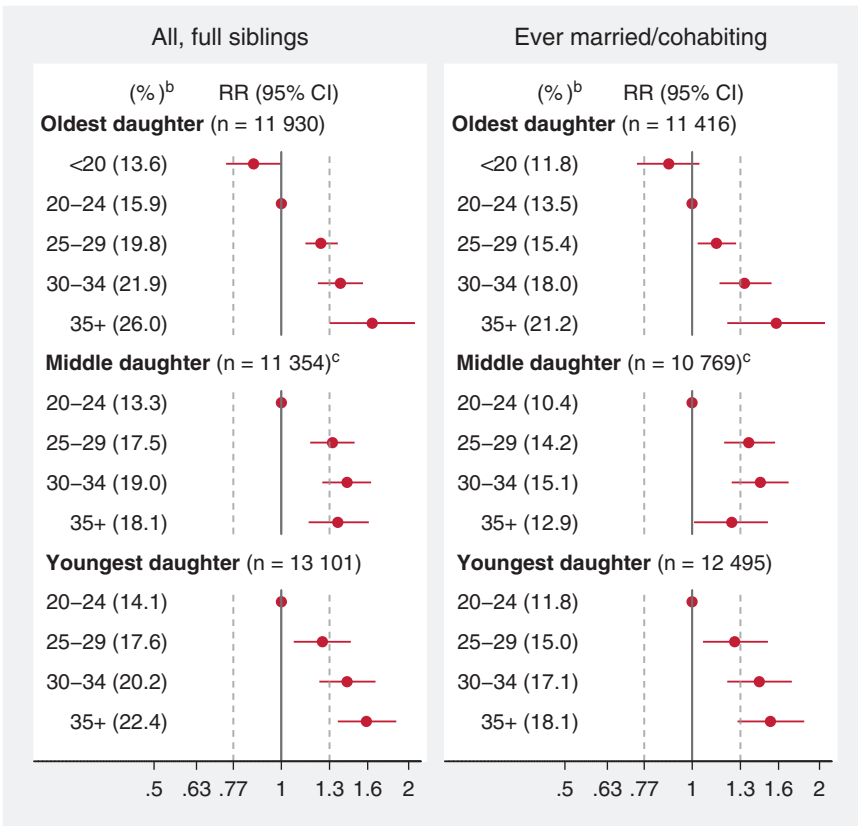

**Figure 3** Association between maternal age at birth and childlessness (RR, 95% CI), stratified by daughter's birth order. All women (left) and restricted to ever married/cohabiting women (right). Vertical dashed lines at 0.77 and 1.30 are included to facilitate comparisons. <sup>a</sup>Oldest daughters may be preceded by male children; analogously, youngest daughters may be followed by male children. Models include: no. of older or same-age siblings, (including brothers: 0, 1, 2+ for oldest daughters, and 1, 2, 3+ for middle and youngest daughters), race/ethnicity, highest household education at age 13, income level growing up, and 5-year birth cohort. In total, 215 women were excluded due to missing information on number and birth order of brothers and sisters. <sup>b</sup>Adjusted predictive marginal probabilities of childlessness (in %). <sup>c</sup>Women with a twin sister are included in this category, regardless of birth order.

environmental inputs (Roth, 2013); it is possible that such inputs differ systematically in daughters of older mothers. The available evidence suggests a genetic influence on fecundity, duration of reproductive life and behaviours associated with fertility (Bentzen et al., 2013; Hartge, 2009; Kohler et al., 1999; McCoy et al., 2015). Although higher underlying fecundity may explain the lower probability of childlessness among middle daughters born to older mothers, taken together, our results raise doubts that genetic and socioeconomic factors can entirely explain the observed association.

The main strengths of this study are the large sample size and the wealth of information on childhood and adult characteristics of participants, which enabled us to examine different subgroups with adequate power. In addition, ~98% of the women in the analytic sample were 50 years or older (and all were at least 44) at the latest follow-up, allowing us to capture completed reproductive histories. Several limitations should also be noted. We had no information on whether childlessness was voluntary, and our indicators of clinical infertility were limited. Participants were mostly White and highly educated; consequently, the associations may be different in other populations. All information was self-reported and thus subject to error, particularly

for information from the participants' childhood, and possibly for maternal age at birth. Still, differential errors by childlessness seem unlikely. A proportion of women linked as being sisters in the data may not have been related, potentially resulting in artificially wider confidence intervals, as we accounted for clustering in the analysis. Inclusion of unrelated women in the sibling analysis would also result in loss of power. However, we included only pairs with consistent reports of maternal age and number of siblings within pairs, factors that had not been considered in the algorithms used to match putative sisters. By design, this study excluded women who had no siblings and those who had only brothers; furthermore, the fact that all study participants had at least one sister (or half-sister) resulted in the sex ratio of siblings being skewed towards females (1.45:1). Although it has been suggested that having older siblings of the same sex may be associated with lower reproductive fitness (Gillespie et al., 2013; Nitsch et al., 2013), we saw no evidence of such a phenomenon in this population (Supplementary Fig. S5).

In sum, we observed a strong positive correlation between maternal age at birth and daughter's childlessness, remarkably consistent across various subgroups and within sisters. Whether our results are due to

biology, behaviour, or socioeconomic factors -or a combination of these, the possible influence of maternal age on offspring fertility deserves further study, particularly in light of the widespread tendency to delay childbearing. If these findings are replicated in other populations, identifying the underlying mechanism is a public health priority.

## Supplementary data

Supplementary data are available at *Human Reproduction* Online.

## Acknowledgements

The authors wish to thank Quaker Harmon and Jack Taylor for helpful comments on an earlier version of this article.

## Funding

Intramural Research Programme of the NIH, National Institute of Environmental Health Sciences (Z01-ES044005).

## Conflict of interest

The authors report no conflict of interest.

## Authors' Contributions

O.B. had the idea for this analysis; she carried out the literature search, designed the study, analysed the data, interpreted the results, and wrote the first draft of the article. C.W. is the Sister Study co-principal investigator (PI); she contributed to data acquisition, study design, data analysis and interpretation, and critically revised the article. A.D.'A. is a data analyst of the Sister Study; she contributed to data acquisition and quality control, interpretation of the data, and critically revised the article. D.S. is the Sister Study PI; she contributed to data acquisition, study design, interpretation of the data, and critically revised the article.

## References

- Adkins RM, Thomas F, Tylavsky FA, Krushkal J. Parental ages and levels of DNA methylation in the newborn are correlated. *BMC Med Genet* 2011; **12**:47.
- Bentzen JG, Forman JL, Larsen EC, Pinborg A, Johannsen TH, Schmidt L, Friis-Hansen L, Andersen AN. Maternal menopause as a predictor of anti-Müllerian hormone level and antral follicle count in daughters during reproductive age. *Hum Reprod* 2013; **28**:247–255.
- Bouwhuys S, Vedder O, Becker PH. Sex-specific pathways of parental age effects on offspring lifetime reproductive success in a long-lived seabird. *Evolution* 2015; **69**:1760–1771.
- Fieder M, Huber S. Paternal age predicts offspring chances of marriage and reproduction. *Am J Hum Biol* 2015; **27**:339–343.
- Ge ZJ, Schatten H, Zhang CL, Sun QY. Oocyte ageing and epigenetics. *Reproduction* 2015; **149**:R103–R114.
- Gillespie DO, Russell AF, Lummaa V. The effect of maternal age and reproductive history on offspring survival and lifetime reproduction in preindustrial humans. *Evolution* 2013; **67**:1964–1974.
- Hartge P. Genetics of reproductive lifespan. *Nat Genet* 2009; **41**:637–638.
- Hayford SR. Marriage (still) matters: the contribution of demographic change to trends in childlessness in the United States. *Demography* 2013; **50**:1641–1661.
- Ho SM, Cheong A, Adgent MA, Veevers J, Suen AA, Tam NN, Leung YK, Jefferson WN, Williams CJ. Environmental factors, epigenetics, and developmental origin of reproductive disorders. *Reprod Toxicol* 2017; **68**:85–104.
- Jefferson WN, Patisaul HB, Williams C. Reproductive consequences of developmental phytoestrogen exposure. *Reproduction* 2012; **143**:247–260. REP-11-0369.
- Joffe M, Barnes I. Do parental factors affect male and female fertility? *Epidemiology* 2000; **11**:700–705.
- Johnson KJ, Carozza SE, Chow EJ, Fox EE, Horel S, McLaughlin CC, Mueller BA, Puumala SE, Reynolds P, Von Behren J et al. Parental age and risk of childhood cancer: a pooled analysis. *Epidemiology* 2009; **20**:475–483.
- Kohler HP, Rodgers JL, Christensen K. Is fertility behavior in our genes? Findings from a Danish twin study. *Popul Dev Rev* 1999; **25**:253–288.
- Kolk M. Understanding transmission of fertility across multiple generations - Socialization or socioeconomic? *Res Soc Stratificat Mobil* 2014; **35**:89–103.
- Lee BK, McGrath JJ. Advancing parental age and autism: multifactorial pathways. *Trends Mol Med* 2015; **21**:118–125.
- Liefbroer AC, Elzinga CH. Intergenerational transmission of behavioural patterns: how similar are parents' and children's demographic trajectories? *Adv Life Course Res* 2012; **17**:1–10.
- Lopes FL, Fortier AL, Darricarrere N, Chan D, Arnold DR, Trasler JM. Reproductive and epigenetic outcomes associated with aging mouse oocytes. *Hum Mol Genet* 2009; **18**:2032–2044.
- Markunas CA, Wilcox AJ, Xu Z, Joubert BR, Harlid S, Panduri V, Haberg SE, Nystad W, London SJ, Sandler DP et al. Maternal age at delivery is associated with an epigenetic signature in both newborns and adults. *PLoS One* 2016; **11**:e0156361.
- Mathews TJ, Hamilton BE. Mean age of mothers is on the rise: United States, 2000–2014. *NCHS Data Brief* 2016; 1–8.
- McCoy RC, Demko Z, Ryan A, Banjevic M, Hill M, Sigurjonsson S, Rabinowitz M, Fraser HB, Petrov DA. Common variants spanning PLK4 are associated with mitotic-origin aneuploidy in human embryos. *Science* 2015; **348**:235–238.
- Nitsch A, Faurie C, Lummaa V. Are elder siblings helpers or competitors? Antagonistic fitness effects of sibling interactions in humans. *Proc R Soc B* 2013; **280**:20122313. The Royal Society.
- OECD. *Family Database.SF2.3: Age of Mothers at Childbirth and Age-specific Fertility*. Updated: 21-03-16. <http://www.oecd.org/els/family/database.htm>. 2016.
- Palmer JR, Hatch EE, Rao RS, Kaufman RH, Herbst AL, Noller KL, Titus-Ernstoff L, Hoover RN. Infertility among women exposed prenatally to diethylstilbestrol. *Am J Epidemiol* 2001; **154**:316–321.
- Perrin M, Kleinhaus K, Messinger J, Malaspina D. Critical periods and the developmental origins of disease: an epigenetic perspective of schizophrenia. *Ann N Y Acad Sci* 2010; **1204**:E8–13.
- Qian Y, Tu J, Tang NL, Kong GW, Chung JP, Chan WY, Lee TL. Dynamic changes of DNA epigenetic marks in mouse oocytes during natural and accelerated aging. *Int J Biochem Cell Biol* 2015; **67**:121–127.
- Roth TL. Epigenetic mechanisms in the development of behavior: advances, challenges, and future promises of a new field. *Dev Psychopathol* 2013; **25**:1279–1291.
- Sampino S, Stankiewicz AM, Zacchini F, Goscik J, Szostak A, Swiergiel AH, Drago G, Modlinski JA, Ptak GE. Pregnancy at advanced maternal age affects behavior and hippocampal gene expression in mouse offspring. *J Gerontol A Biol Sci Med Sci* 2017; **72**:1465–1473.
- Sandin S, Hultman CM, Klevzon A, Gross R, MacCabe JH, Reichenberg A. Advancing maternal age is associated with increasing risk for autism: a review and meta-analysis. *J Am Acad Child Adolesc Psychiatry* 2012; **51**:477–486.e471.



- Sandler DP, Hodgson EM, Deming-Halverson SL, Juras PS, D'Aloisio AA, Suarez LM, Kleeberger CA, Shore DL, DeRoo LA, Taylor JA et al. The sister study cohort: baseline methods and participant characteristics. *Environ Health Perspect* 2017. doi:10.1289/EHP1923.
- Schmidt L, Sobotka T, Bentzen JG, Nyboe Andersen A, Reproduction E, Society Task F. Demographic and medical consequences of the postponement of parenthood. *Hum Reprod Update* 2012;18:29–43.
- Schroeder J, Nakagawa S, Rees M, Mannarelli ME, Burke T. Reduced fitness in progeny from old parents in a natural population. *Proc Natl Acad Sci U S A* 2015;112:4021–4025.
- Smits L, Zielhuis G, Jongbloet P, Bouchard G. The association of birth interval, maternal age and season of birth with the fertility of daughters: a retrospective cohort study based on family reconstitutions from nineteenth and early twentieth century Quebec. *Paediatr Perinat Epidemiol* 1999;13:408–420.
- Smits LJ, Willemsen WN, Zielhuis GA, Jongbloet PH. Conditions at conception and risk of menstrual disorders. *Epidemiology* 1997;8:524–529.
- Smits LJ, Zielhuis GA, Jongbloet PH, Van Poppel FW. Mother's age and daughter's fecundity. An epidemiological analysis of late 19th to early 20th century family reconstitutions. *Int J Epidemiol* 2002;31:349–358.
- Sominsky L, Fuller EA, Hodgson DM. Factors in early-life programming of reproductive fitness. *Neuroendocrinology* 2015;102:216–225.
- Steenhof L, Liefbroer AC. Intergenerational transmission of age at first birth in the Netherlands for birth cohorts born between 1935 and 1984: evidence from municipal registers. *Popul Stud J Demogr* 2008;62:69–84.
- Steuerwald NM, Bermudez MG, Wells D, Munne S, Cohen J. Maternal age-related differential global expression profiles observed in human oocytes. *Reprod Biomed Online* 2007;14:700–708.
- Tarín JJ, Vidal E, Pérez-Hoyos S, Cano A, Balasch J. Delayed motherhood increases the probability of sons to be infertile. *J Assist Reprod Genet* 2001;18:650–654.
- te Velde E, Habbema D, Leridon H, Eijkemans M. The effect of postponement of first motherhood on permanent involuntary childlessness and total fertility rate in six European countries since the 1970s. *Hum Reprod* 2012;27:1179–1183.
- Velazquez MA, Smith CG, Smyth NR, Osmond C, Fleming TP. Advanced maternal age causes adverse programming of mouse blastocysts leading to altered growth and impaired cardiometabolic health in post-natal life. *Hum Reprod* 2016;31:1970–1980.
- Ye X, Skjaerven R, Basso O, Baird DD, Eggesbo M, Cupul Uicab LA, Haug K, Longnecker MP. In utero exposure to tobacco smoke and subsequent reduced fertility in females. *Hum Reprod* 2010;25:2901–2906.
- Yip BH, Pawitan Y, Czene K. Parental age and risk of childhood cancers: a population-based cohort study from Sweden. *Int J Epidemiol* 2006;35:1495–1503.
- Zambrano E, Guzman C, Rodriguez-Gonzalez GL, Durand-Carbajal M, Nathanielsz PW. Fetal programming of sexual development and reproductive function. *Mol Cell Endocrinol* 2014;382:538–549.
